# Supplementary material for: Spatiotemporal Intertropical Convergence Zone dynamics during the last 3 millennia in northeastern Brazil and related impacts in modern human history
Source: Copernicus journal article supplement (doi:10.5194/cp-19-1975-2023), 2023-10-17
Supplement: Supplementary file 1 [file cp-19-1975-2023-supplement.pdf]

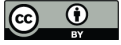

*Supplement of*

## **Spatiotemporal Intertropical Convergence Zone dynamics during the last 3 millennia in northeastern Brazil and related impacts in modern human history**

**Giselle Utida et al.**

*Correspondence to:* Giselle Utida ([giselleutida@hotmail.com](mailto:giselleutida@hotmail.com))

The copyright of individual parts of the supplement might differ from the article licence.

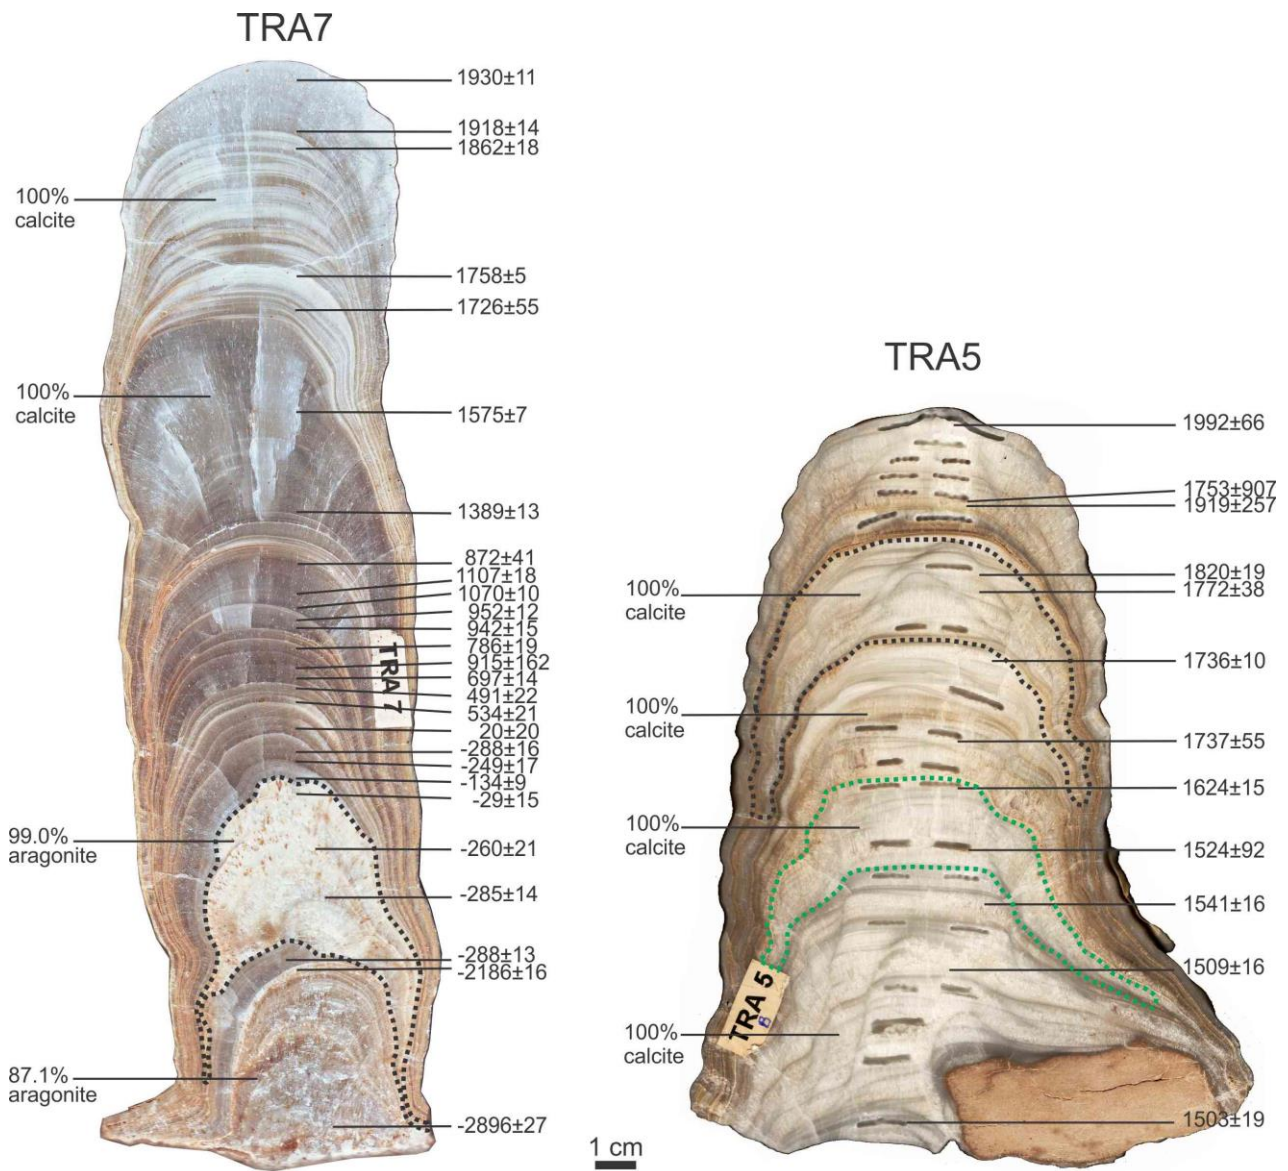

Figure S1 – TRA7 and TRA5 speleothem images indicating results of U/Th ages in BCE/CE and mineralogical composition. Outlines indicate the portions according to mineralogy. TRA7 ages and mineralogy obtained by Utida et al. (2020).

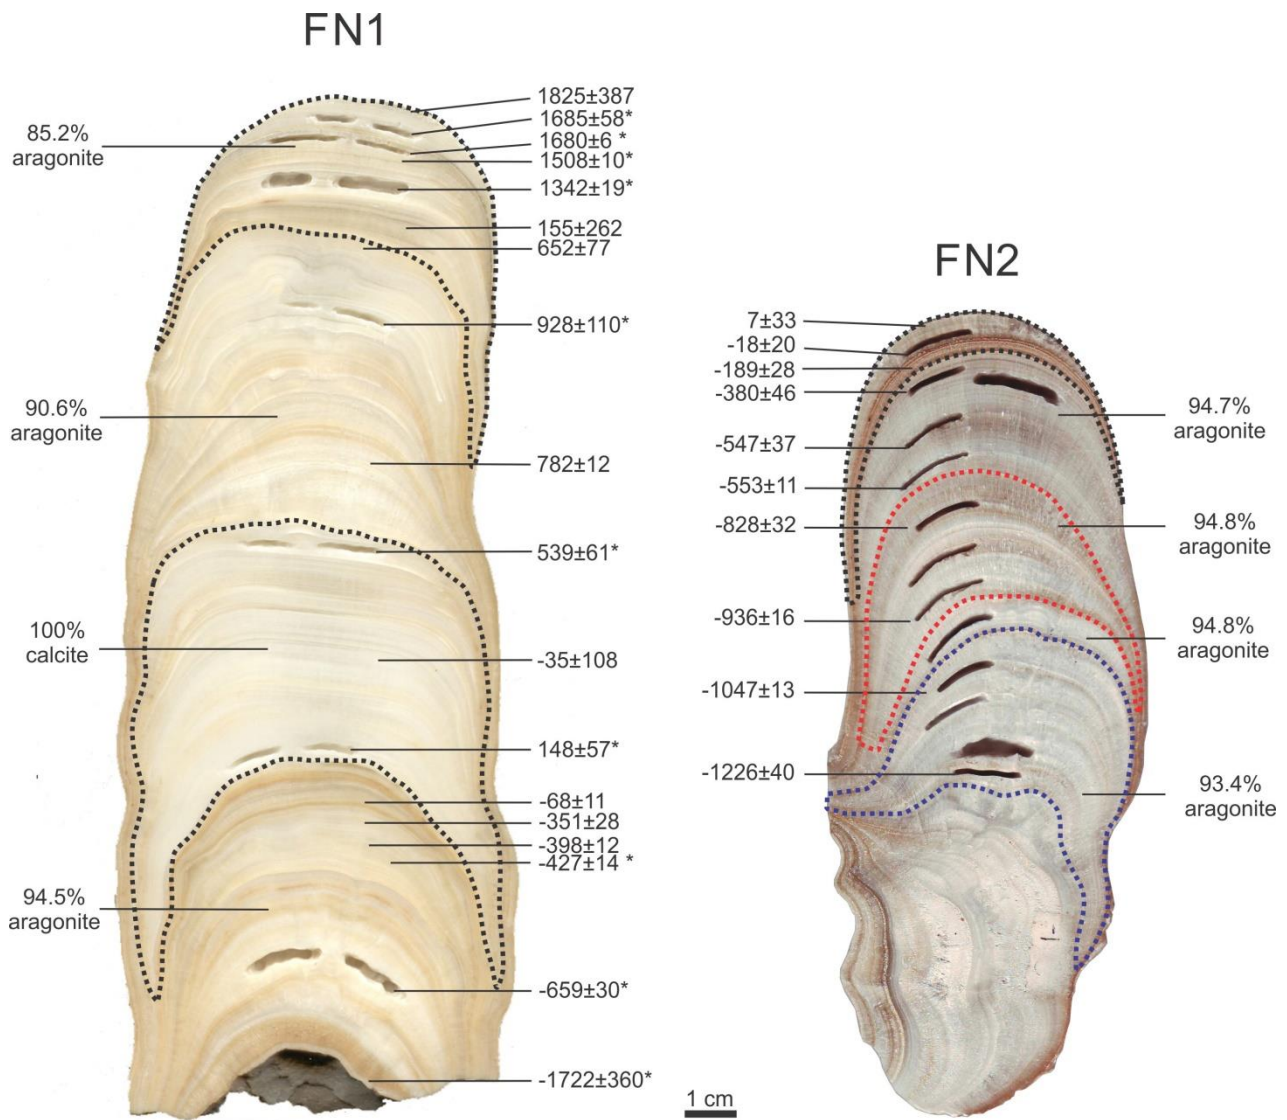

Figure S2 – Speleothem FN1 and FN2 images indicating results of U/Th ages BCE/CE. Outlines indicate the portions according to mineralogy. \* FN1 ages obtained by Cruz et al. (2009). FN1 mineralogy obtained by Utida et al. (2020).

Table S1 – Chronological results. U/Th results obtained from speleothem FN1 and FN2. <sup>1</sup>Data obtained by Cruz et al. (2009).

| Sample Number         | Depth (mm) | <sup>238</sup> U (ppb) | <sup>232</sup> Th (ppt) | <sup>230</sup> Th / <sup>232</sup> Th (atomic x10 <sup>-6</sup> ) | d <sup>234</sup> U* (measured) | <sup>230</sup> Th / <sup>238</sup> U (activity) | <sup>230</sup> Th Age (yr) (uncorrected) | <sup>230</sup> Th Age (yr) (corrected) | δ <sup>234</sup> U <sub>initial</sub> ** (corrected) | <sup>230</sup> Th Age (yr BP)*** (corrected) | Age BCE/CE |
|-----------------------|------------|------------------------|-------------------------|-------------------------------------------------------------------|--------------------------------|-------------------------------------------------|------------------------------------------|----------------------------------------|------------------------------------------------------|----------------------------------------------|------------|
| <b>FN1 speleothem</b> |            |                        |                         |                                                                   |                                |                                                 |                                          |                                        |                                                      |                                              |            |
| FN1-1                 | 1          | 214 ± 1                | 3825 ± 18               | 5.8 ± 2                                                           | -60 ± 4                        | 0.0064 ± 0.00232                                | 739 ± 271                                | 183 ± 387                              | -60 ± 4                                              | 125 ± 387                                    | 1825       |
| FN1-a <sup>1</sup>    | 5          | 119 ± 0                | 228 ± 2                 | 28 ± 4                                                            | -68 ± 3                        | 0.0033 ± 0.00043                                | 383 ± 50                                 | 323 ± 58                               | -68 ± 3                                              | 265 ± 58                                     | 1685       |
| FN1-b <sup>1</sup>    | 9          | 4134 ± 16              | 698 ± 2                 | 280 ± 5                                                           | -58 ± 1                        | 0.0029 ± 0.00005                                | 333 ± 6                                  | 328 ± 6                                | -58 ± 1                                              | 270 ± 6                                      | 1680       |
| FN1-B1 <sup>1</sup>   | 12         | 7837 ± 26              | 3878 ± 10               | 148 ± 2                                                           | -58 ± 2                        | 0.0044 ± 0.00006                                | 515 ± 7                                  | 500 ± 10                               | -58 ± 2                                              | 442 ± 10                                     | 1508       |
| FN1-T <sup>1</sup>    | 16         | 1152 ± 4               | 1256 ± 3                | 91 ± 1                                                            | -61 ± 2                        | 0.0060 ± 0.00007                                | 700 ± 9                                  | 666 ± 19                               | -61 ± 2                                              | 608 ± 19                                     | 1342       |
| FN1-22                | 22         | 701 ± 2                | 8378 ± 169              | 26 ± 1                                                            | -58 ± 2                        | 0.0191 ± 0.00013                                | 2234 ± 17                                | 1864 ± 262                             | -58 ± 2                                              | 1795 ± 262                                   | 155        |
| FN1-T2                | 29         | 812 ± 1                | 2425 ± 49               | 69 ± 2                                                            | -56 ± 1                        | 0.0125 ± 0.00034                                | 1453 ± 40                                | 1360 ± 77                              | -57 ± 1                                              | 1298 ± 77                                    | 652        |
| FN1-2 <sup>1</sup>    | 41         | 48 ± 0                 | 151 ± 2                 | 54 ± 5                                                            | -53 ± 2                        | 0.0102 ± 0.00089                                | 1180 ± 100                               | 1080 ± 110                             | -53 ± 2                                              | 1022 ± 110                                   | 928        |
| FN1-2A                | 72         | 5814 ± 36              | 1171 ± 6                | 868 ± 7                                                           | -57 ± 4                        | 0.0106 ± 0.00009                                | 1232 ± 12                                | 1226 ± 12                              | -57 ± 4                                              | 1168 ± 12                                    | 782        |
| FN1-3 <sup>1</sup>    | 88         | 85 ± 0                 | 209 ± 1                 | 90 ± 3                                                            | -56 ± 2                        | 0.0133 ± 0.00041                                | 1545 ± 48                                | 1469 ± 61                              | -56 ± 2                                              | 1411 ± 61                                    | 539        |
| FN1-106               | 106        | 508 ± 1                | 2506 ± 50               | 63 ± 1                                                            | -52 ± 2                        | 0.0190 ± 0.00014                                | 2205 ± 16                                | 2054 ± 108                             | -52 ± 2                                              | 1985 ± 108                                   | -35        |
| FN1-4 <sup>1</sup>    | 127        | 75 ± 0                 | 97 ± 1                  | 210 ± 7                                                           | -53 ± 3                        | 0.0164 ± 0.00046                                | 1899 ± 54                                | 1860 ± 57                              | -53 ± 3                                              | 1802 ± 57                                    | 148        |
| FN1-4.1               | 137        | 13580 ± 49             | 2593 ± 53               | 1535 ± 31                                                         | -62 ± 2                        | 0.0178 ± 0.00008                                | 2086 ± 10                                | 2080 ± 11                              | -62 ± 2                                              | 2018 ± 11                                    | -68        |
| FN1-140               | 140        | 12302 ± 97             | 9588 ± 208              | 433 ± 9                                                           | -57 ± 3                        | 0.0205 ± 0.00017                                | 2394 ± 22                                | 2370 ± 28                              | -57 ± 3                                              | 2301 ± 28                                    | -351       |
| FN1-4.2               | 145        | 15185 ± 51             | 4074 ± 82               | 1271 ± 26                                                         | -57 ± 2                        | 0.0207 ± 0.00008                                | 2418 ± 10                                | 2410 ± 12                              | -57 ± 2                                              | 2348 ± 12                                    | -398       |
| FN1-4A <sup>1</sup>   | 147        | 17533 ± 81             | 3486 ± 7                | 1734 ± 6                                                          | -55 ± 2                        | 0.0209 ± 0.00011                                | 2441 ± 14                                | 2435 ± 14                              | -56 ± 2                                              | 2377 ± 14                                    | -427       |
| FN1-B <sup>1</sup>    | 187        | 20240 ± 200            | 2847 ± 8                | 2680 ± 12                                                         | -55 ± 3                        | 0.0229 ± 0.00024                                | 2671 ± 30                                | 2667 ± 30                              | -55 ± 3                                              | 2609 ± 30                                    | -659       |
| FN1-4B <sup>1</sup>   | 202        | 7297 ± 22              | 165820 ± 830            | 27 ± 1                                                            | -52 ± 2                        | 0.0377 ± 0.00076                                | 4435 ± 91                                | 3730 ± 360                             | -52 ± 2                                              | 3672 ± 360                                   | -1722      |
| <b>FN2 speleothem</b> |            |                        |                         |                                                                   |                                |                                                 |                                          |                                        |                                                      |                                              |            |
| FN2-1                 | 1          | 4480 ± 13              | 7017 ± 142              | 197 ± 4                                                           | -1 ± 2                         | 0.0187 ± 0.00007                                | 2058 ± 8                                 | 2012 ± 33                              | -1 ± 2                                               | 1943 ± 33                                    | 7          |
| FN2-4                 | 4          | 5566 ± 15              | 4344 ± 12               | 392 ± 3                                                           | -4 ± 2                         | 0.0185 ± 0.00000                                | 2052 ± 16                                | 2030 ± 20                              | -4 ± 2                                               | 1968 ± 20                                    | -18        |
| FN2-6                 | 6          | 5161 ± 31              | 5881 ± 123              | 294 ± 6                                                           | 0 ± 3                          | 0.0203 ± 0.00013                                | 2241 ± 16                                | 2208 ± 28                              | 0 ± 3                                                | 2139 ± 28                                    | -189       |
| FN2-2                 | 10         | 4525 ± 17              | 9648 ± 196              | 172 ± 4                                                           | 1 ± 2                          | 0.0223 ± 0.00010                                | 2454 ± 14                                | 2392 ± 46                              | 1 ± 2                                                | 2330 ± 46                                    | -380       |
| FN2-20                | 20         | 6588 ± 15              | 11520 ± 232             | 222 ± 5                                                           | -4 ± 2                         | 0.0236 ± 0.00008                                | 2610 ± 10                                | 2559 ± 37                              | -4 ± 2                                               | 2497 ± 37                                    | -547       |
| FN2-27                | 27         | 8524 ± 23              | 1698 ± 35               | 1918 ± 39                                                         | -5 ± 2                         | 0.0232 ± 0.00008                                | 2571 ± 10                                | 2565 ± 11                              | -5 ± 2                                               | 2503 ± 11                                    | -553       |
| FN2-3                 | 45         | 4895 ± 20              | 6182 ± 126              | 338 ± 7                                                           | -2 ± 2                         | 0.0259 ± 0.00010                                | 2867 ± 18                                | 2830 ± 32                              | -2 ± 2                                               | 2768 ± 32                                    | -818       |
| FN2-52                | 52         | 9454 ± 30              | 3965 ± 80               | 1041 ± 21                                                         | -11 ± 2                        | 0.0265 ± 0.00010                                | 2960 ± 13                                | 2948 ± 16                              | -11 ± 2                                              | 2886 ± 16                                    | -936       |
| FN2-74                | 74         | 16129 ± 50             | 3438 ± 70               | 2131 ± 43                                                         | -6 ± 2                         | 0.0275 ± 0.00009                                | 3065 ± 12                                | 3059 ± 13                              | -6 ± 2                                               | 2997 ± 13                                    | -1047      |
| FN2-6                 | 90         | 21367 ± 213            | 2993 ± 17               | 3410 ± 23                                                         | -11 ± 6                        | 0.0289 ± 0.00031                                | 3242 ± 40                                | 3238 ± 40                              | -11 ± 6                                              | 3176 ± 40                                    | -1226      |

U decay constants:  $\lambda_{238} = 1.55125 \times 10^{-10}$  (Jaffey et al., 1971) and  $\lambda_{234} = 2.82206 \times 10^{-6}$  (Cheng et al., 2013). Th decay constant:  $\lambda_{230} = 9.1705 \times 10^{-6}$  (Cheng et al., 2013). \* $\delta^{234}\text{U} = ([^{234}\text{U}/^{238}\text{U}]_{\text{activity}} - 1) \times 1000$ . \*\*  $\delta^{234}\text{U}_{\text{initial}}$  was calculated based on <sup>230</sup>Th age (T). i.e.  $\delta^{234}\text{U}_{\text{initial}} = \delta^{234}\text{U}_{\text{measured}} \times e^{\lambda_{234} \times T}$ . Corrected <sup>230</sup>Th ages assume the initial <sup>230</sup>Th/<sup>232</sup>Th atomic ratio of  $4.4 \pm 2.2 \times 10^{-6}$ . Those are the values for a material at secular equilibrium, with the bulk earth <sup>230</sup>Th/<sup>238</sup>U value of 3.8. The errors are arbitrarily assumed to be 50%. \*\*\*B.P. stands for “Before Present” where the “Present” is defined as the year 1950 A.D.

Table S2 – Chronological results. U/Th results obtained from speleothem TRA5.

| Sample Number          | Depth (mm) | <sup>238</sup> U (ppb) | <sup>232</sup> Th (ppt) | <sup>230</sup> Th / <sup>232</sup> Th (atomic x10 <sup>-6</sup> ) | d <sup>234</sup> U* (measured) | <sup>230</sup> Th / <sup>238</sup> U (activity) | <sup>230</sup> Th Age (yr) (uncorrected) | <sup>230</sup> Th Age (yr) (corrected) | δ <sup>234</sup> U <sub>initial</sub> ** (corrected) | <sup>230</sup> Th Age (yr BP)*** (corrected) | Age BCE/CE |
|------------------------|------------|------------------------|-------------------------|-------------------------------------------------------------------|--------------------------------|-------------------------------------------------|------------------------------------------|----------------------------------------|------------------------------------------------------|----------------------------------------------|------------|
| <b>TRA5 speleothem</b> |            |                        |                         |                                                                   |                                |                                                 |                                          |                                        |                                                      |                                              |            |
| TRA5-2                 | 7          | 1411 ± 2               | 3788 ± 76               | 6 ± 1                                                             | -145 ± 2                       | 0.0009 ± 0.00009                                | 119 ± 12                                 | 27 ± 66                                | -145 ± 2                                             | -42 ± 66                                     | 1992       |
| TRA5-18                | 18         | 2035 ± 4               | 76686 ± 1543            | 5 ± 0                                                             | -139 ± 2                       | 0.0121 ± 0.00019                                | 1541 ± 25                                | 259 ± 907                              | -139 ± 2                                             | 197 ± 907                                    | 1753       |
| TRA5-20                | 20         | 1915 ± 4               | 20400 ± 410             | 6 ± 0                                                             | -145 ± 2                       | 0.0036 ± 0.00010                                | 463 ± 12                                 | 100 ± 257                              | -145 ± 2                                             | 31 ± 257                                     | 1919       |
| TRA5b-37               | 37         | 1977 ± 2               | 612 ± 13                | 89 ± 8                                                            | -139 ± 1                       | 0.0017 ± 0.00014                                | 211 ± 18                                 | 200 ± 19                               | -139 ± 1                                             | 130 ± 19                                     | 1820       |
| TRA5-41                | 41         | 1889 ± 5               | 2858 ± 58               | 25 ± 1                                                            | -138 ± 2                       | 0.0023 ± 0.00008                                | 291 ± 10                                 | 240 ± 38                               | -138 ± 2                                             | 178 ± 38                                     | 1772       |
| TRA5-58                | 58         | 1921 ± 3               | 585 ± 12                | 122 ± 4                                                           | -142 ± 2                       | 0.0022 ± 0.00006                                | 286 ± 7                                  | 276 ± 10                               | -142 ± 2                                             | 214 ± 10                                     | 1736       |
| TRA5-71                | 71         | 2371 ± 14              | 5165 ± 108              | 21 ± 1                                                            | -147 ± 5                       | 0.0028 ± 0.00012                                | 356 ± 16                                 | 282 ± 55                               | -147 ± 5                                             | 213 ± 55                                     | 1737       |
| TRA5b-90               | 90         | 2031 ± 2               | 256 ± 6                 | 413 ± 18                                                          | -139 ± 1                       | 0.0032 ± 0.00011                                | 401 ± 14                                 | 396 ± 15                               | -139 ± 1                                             | 326 ± 15                                     | 1624       |
| TRA5-104               | 104        | 2018 ± 14              | 7328 ± 155              | 22 ± 1                                                            | -141 ± 6                       | 0.0049 ± 0.00023                                | 618 ± 29                                 | 495 ± 92                               | -141 ± 6                                             | 426 ± 92                                     | 1524       |
| TRA5-116               | 116        | 1785 ± 4               | 912 ± 18                | 124 ± 4                                                           | -139 ± 2                       | 0.0038 ± 0.00008                                | 488 ± 10                                 | 471 ± 16                               | -139 ± 2                                             | 409 ± 16                                     | 1541       |
| TRA5-132               | 132        | 2699 ± 5               | 1549 ± 31               | 118 ± 3                                                           | -140 ± 2                       | 0.0041 ± 0.00006                                | 522 ± 8                                  | 503 ± 16                               | -140 ± 2                                             | 441 ± 16                                     | 1509       |
| TRA5b-169              | 169        | 1969 ± 2               | 108 ± 5                 | 1237 ± 73                                                         | -136 ± 1                       | 0.0041 ± 0.00015                                | 519 ± 19                                 | 517 ± 19                               | -136 ± 1                                             | 447 ± 19                                     | 1503       |

U decay constants:  $\lambda_{238} = 1.55125 \times 10^{-10}$  (Jaffey et al., 1971) and  $\lambda_{234} = 2.82206 \times 10^{-6}$  (Cheng et al., 2013). Th decay constant:  $\lambda_{230} = 9.1705 \times 10^{-6}$  (Cheng et al., 2013). \* $\delta^{234}\text{U} = ([^{234}\text{U}/^{238}\text{U}]_{\text{activity}} - 1) \times 1000$ . \*\*  $\delta^{234}\text{U}_{\text{initial}}$  was calculated based on <sup>230</sup>Th age (T). i.e.,  $\delta^{234}\text{U}_{\text{initial}} = \delta^{234}\text{U}_{\text{measured}} \times e^{\lambda_{234} \times T}$ . Corrected <sup>230</sup>Th ages assume the initial <sup>230</sup>Th/<sup>232</sup>Th atomic ratio of  $4.4 \pm 2.2 \times 10^{-6}$ . Those are the values for a material at secular equilibrium with the bulk earth <sup>232</sup>Th/<sup>238</sup>U value of 3.8. The errors are arbitrarily assumed to be 50%. \*\*\*B.P. stands for “Before Present” where the “Present” is defined as the year 1950 A.D.

1 Table S3 – Parameters used to establish the composite record of Trapiá and Furna Nova  
 2 stalagmites with *iscam* programming (Fohlmeister, 2012)

| Parameter | Range  | Description                                               |
|-----------|--------|-----------------------------------------------------------|
| nrAR1     | 2000   | Number of AR1 simulations                                 |
| nrAR1_MC  | 1000   | Number of MC runs for each AR1                            |
| nrMC      | 100000 | Number of MC simulations for measured data sets           |
| nrSMOOTH  | 10     | Number of years used for smoothing before the correlation |
| CUT       | 1      | Extrapolation of isotope data allowed beyond dated depths |
| GAUSS     | 0      | MC simulations with Gaussian distribution                 |
| Interpol  | -1     | Pointwise linear interpolation between dated depths       |
| Detrend   | 2      | Detrending and normalizing before running the method      |

3

4 Calcite-Aragonite fractionation

5 We use the aragonite-calcite fractionation offset described by Zhang et al. (2014) obtained  
 6 for stalagmites from China. We used the equation 1 below to consider the proportion between  
 7 calcite and original aragonite for each stalagmite interval of RN stalagmites, according to the Table  
 8 S3. We included the mean  $\delta^{18}\text{O}$  for each interval before and after C-A correction in Table S3.

9

10 
$$\delta^{18}\text{O}_{\text{C-A corr}} = \frac{\text{sample calcite \%}}{100\% \text{ original aragonite}} \times \text{calcite fractionation offset} \quad \text{Equation (1)}$$

11

12 Table S4 – Speleothem intervals according to texture and mineral weight proportion (wt).  
 13 Texture description: A - crystals with mosaic and columnar fabrics; B - interbedded needle-like  
 14 crystals. \*Obtained by Utida et al. (2020). C-A: calcite-aragonite correction

| Speleothem Mineralogy |               |                    |         |                  |                |                                     |                      |
|-----------------------|---------------|--------------------|---------|------------------|----------------|-------------------------------------|----------------------|
| Sample                | Interval (mm) | Age (yr BCE/CE)    | Texture | Aragonite (wt %) | Calcite (wt %) | $\delta^{18}\text{O}$ mean (‰ VPDB) |                      |
|                       |               |                    |         |                  |                | before C-A correction               | after C-A correction |
| TRA5                  | 30-54         | 1745 to 1855 CE    | A       | 0.0              | <b>100.0</b>   | -3.50                               | -2.65                |
|                       | 54-87         | 1640 to 1745 CE    | A       | 0.0              | <b>100.0</b>   | -3.56                               | -2.71                |
|                       | 87-108        | 1565 to 1640 CE    | A       | 0.0              | <b>100.0</b>   | -3.58                               | -2.73                |
|                       | 108-178       | 1490 to 1565 CE    | A       | 0.0              | <b>100.0</b>   | -3.40                               | -2.55                |
| TRA7*                 | 0-173         | 130 BCE to 1940 CE | A       | 0.0              | <b>100.0</b>   | -2.80                               | -1.95                |
|                       | 173-215       | 290 to 130 BCE     | B       | <b>99.0</b>      | 1.0            | -2.14                               | -2.13                |
|                       | 215-270       | 3000 to 290 BCE    | B       | <b>87.1</b>      | 12.9           | -3.12                               | -3.01                |
| FN1*                  | 0-27          | 1170 to 1790 CE    | B       | <b>85.2</b>      | 14.9           | -2.14                               | -2.01                |
|                       | 27-83         | 610 to 1170 CE     | B       | <b>90.6</b>      | 9.4            | -2.87                               | -2.78                |
|                       | 83-128        | 80 to 610 CE       | A       | 0.0              | <b>100.0</b>   | -1.87                               | -1.03                |
|                       | 128-202       | 1730 BCE to 80 CE  | B       | <b>94.5</b>      | 5.5            | -2.54                               | -2.49                |
| FN2                   | 6-31          | 660 to 189 BCE     | B       | <b>94.7</b>      | 5.3            | -1.20                               | -1.15                |
|                       | 31-56         | 960 to 660 BCE     | B       | <b>94.8</b>      | 5.2            | -1.56                               | -1.52                |
|                       | 56-63         | 1005 to 960 BCE    | B       | <b>94.8</b>      | 5.2            | -2.03                               | -1.99                |
|                       | 63-95         | 1265 to 1005 BCE   | B       | <b>93.4</b>      | 6.6            | -1.94                               | -1.88                |

15

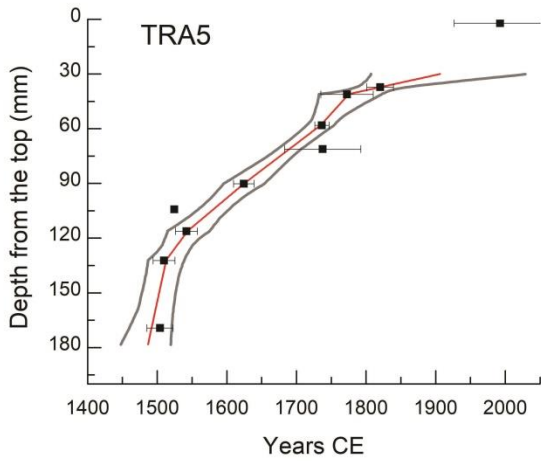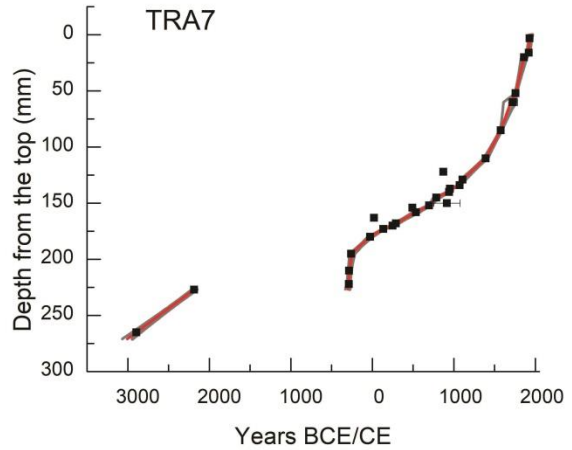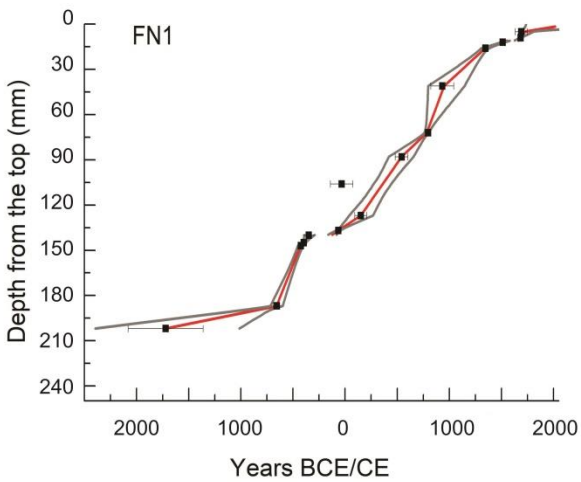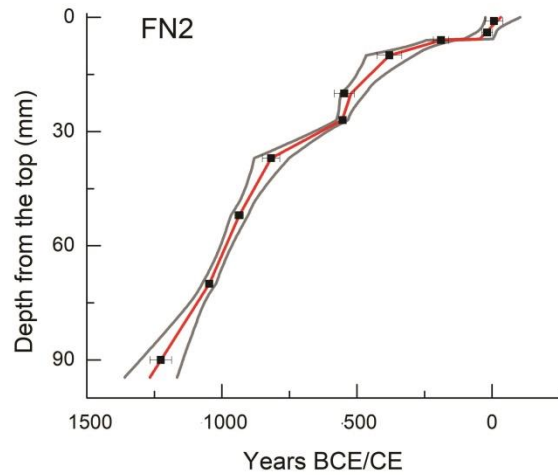

16

17 Figure S3 – Age models of each stalagmite from Rio Grande do Norte. Age models were  
 18 calculated using COPRA (Breitenbach et al., 2012) through a set of 2.000 Monte Carlo simulations.  
 19 The COPRA age model was produced for each sample and covers the entire stalagmite. Squares  
 20 and horizontal bars: age results with error bars. Red line: COPRA average age model. Grey line:  
 21 age model errors considering 95% confidence interval.



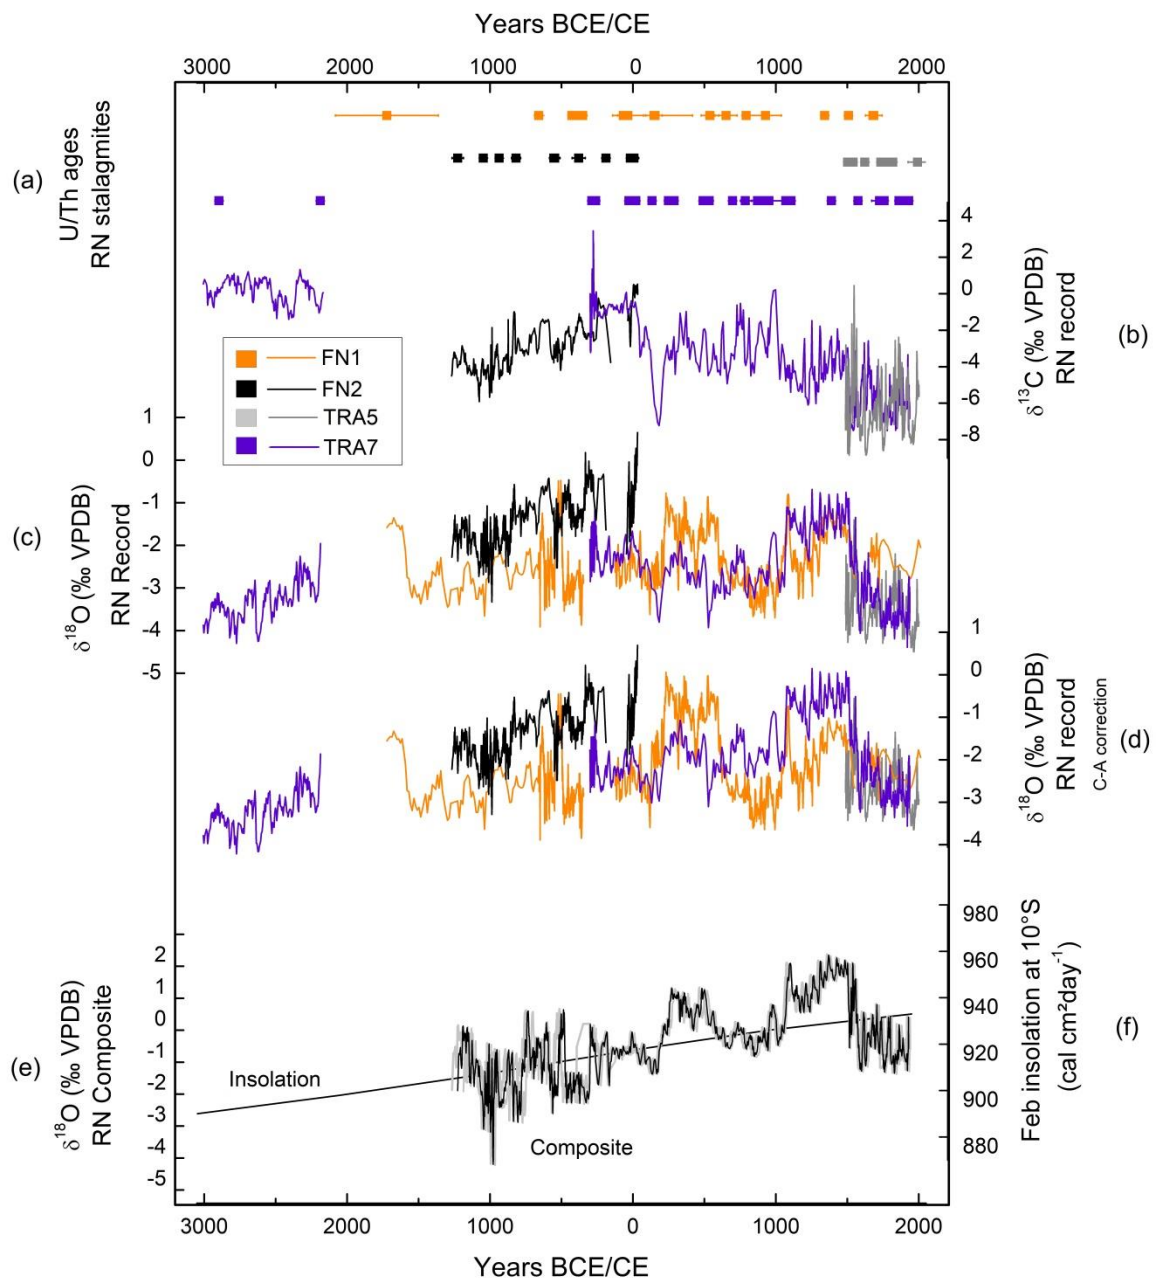

22

23

24 Figure S4 – Rio Grande do Norte stalagmite isotope record. (a) U/Th ages for RN  
 25 stalagmites. (b) Raw data of  $\delta^{13}\text{C}$ . (c) Oxygen isotope results for RN record. (d) Oxygen isotope  
 26 results corrected for calcite-aragonite fractionation ( $\delta^{18}\text{O}_{\text{C-A}}$ ), according to weight proportion of  
 27 mineralogical results. (e)  $\delta^{18}\text{O}$  RN Composite constructed using stalagmite records from NEB  
 28 (black line). Grey lines denote the age model confidence interval of 99%. (f) February insolation  
 29 curve at  $10^\circ\text{S}$  (Berger and Loutre, 1991).

30



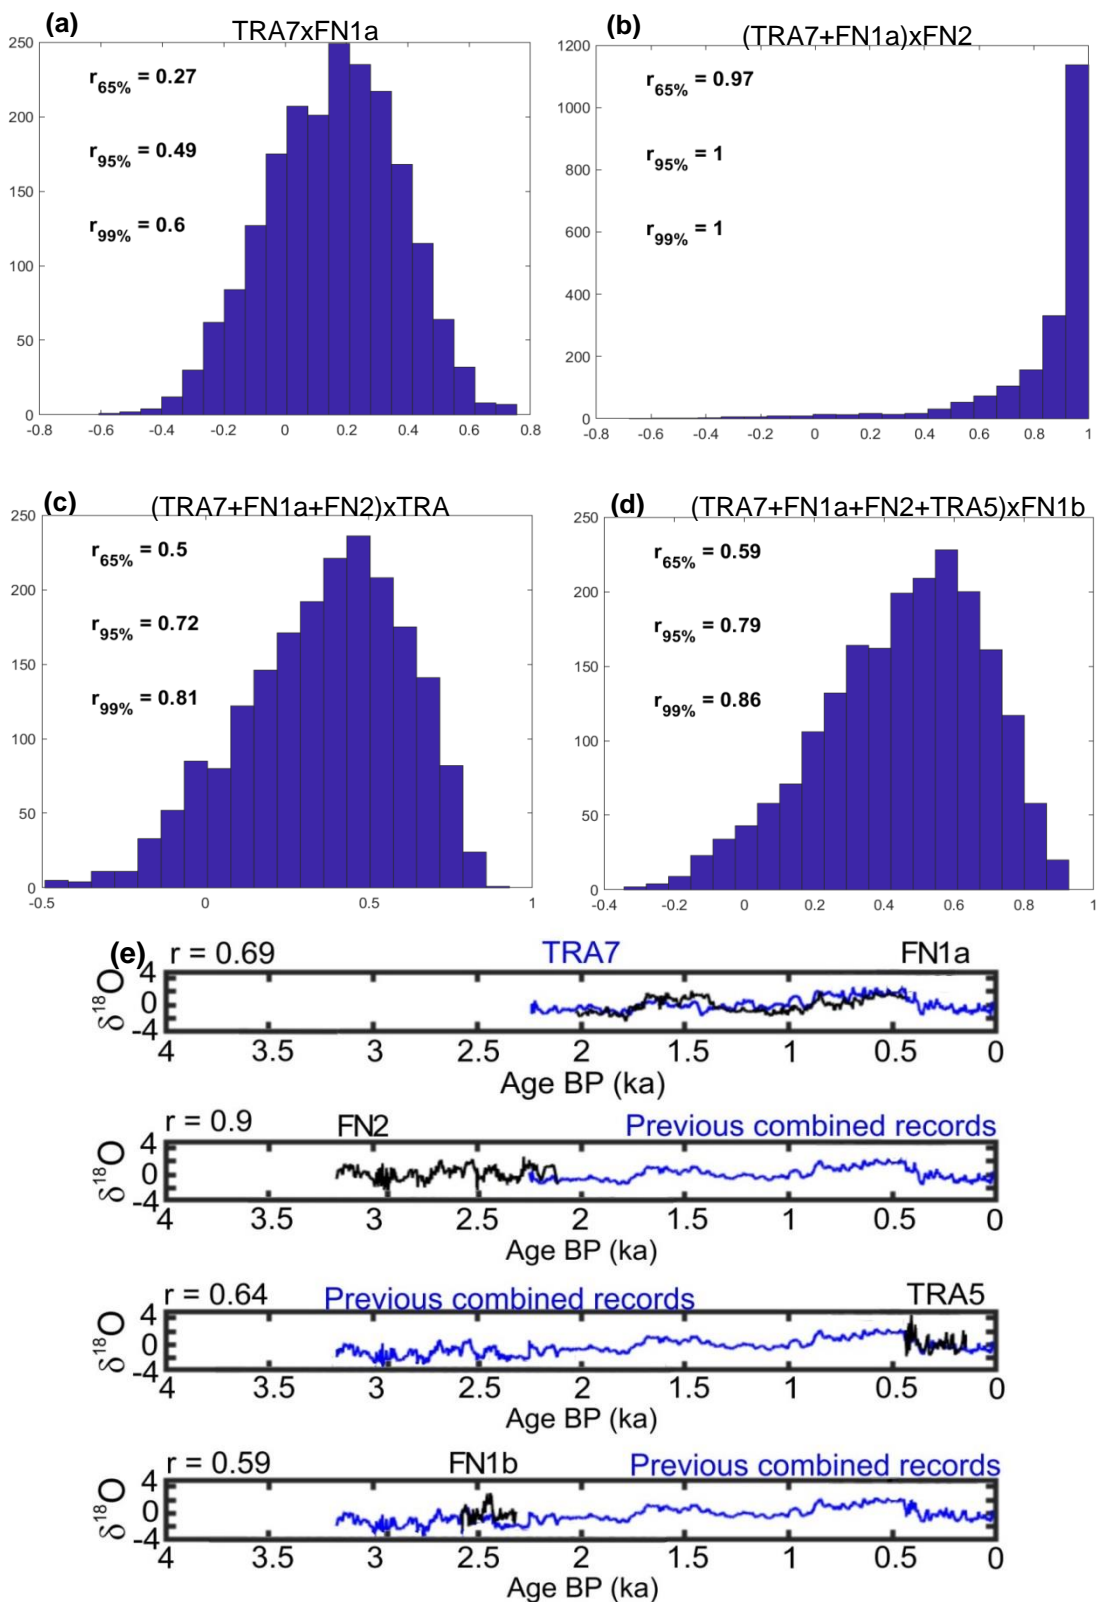

31

32 Figure S5 – Distribution of maximum correlation coefficients for 2000 pairs of AR1 time  
 33 series with the same characteristics as the measured  $\delta^{18}O$  stalagmite time series. a) distribution for  
 34 TRA7 and FN1a; b) distribution for TRA7+FN1a and FN2; c) distribution for TRA7+FN1a+FN2 and  
 35 TRA5; d) distribution for TRA7+FN1a+FN2+TRA5 and FN1b. e) Best time series results for the  
 36 individual steps *iscam* performs for the composite time series construction. Highest correlation  
 37 coefficient is indicated for each correlation step. All established time series are significant at the  
 38 95% confidence limit.

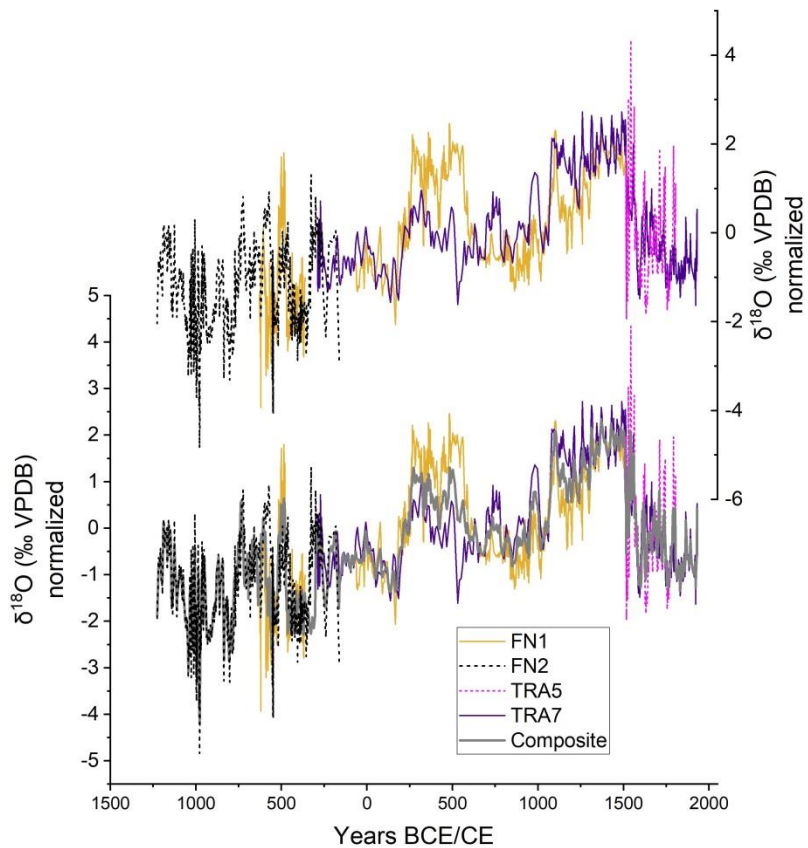

39

40 Figure S6 – Oxygen isotopes plotted according to age model results calculated by ISCAM  
 41 for RN record and RN Composite. The normalization of data is made by ISCAM (Fohlmeister,  
 42 2012).

43

44 *References*

45 Berger, A., Loutre, M.F.: Insolation values for the climate of the last 10 million of years. *Quat. Sci.*  
 46 *Rev.*, 10, 297e317, [https://doi.org/10.1016/0277-3791\(91\)90033-Q](https://doi.org/10.1016/0277-3791(91)90033-Q), 1991.

47 Breitenbach. S.F.M., Rehfeld. K., Goswami. B., Baldini. J.U.L., Ridley. H. E., Kennett. D. J., Pruffer.  
 48 K.M., Aquino. V.V., Asmerom. Y., Polyak. V.J., Cheng. H., Kurths. J., Marwan. N.:  
 49 COConstructing Proxy Records from Age models (COPRA), *Clim. Past*, 8, 1765–1779,  
 50 <https://doi.org/10.5194/cp-8-1765-2012>, 2012.

51 Cheng, H., Edwards, R.L., Shen, C-C., Polyak, V.J., Asmerom, Y., Woodhead, J., Hellstrom, J.,  
 52 Wang, Y., Kong, X., Spötl, C., Wang, X., Alexander Jr. E.C.: Improvements in <sup>230</sup>Th dating,  
 53 <sup>230</sup>Th and <sup>234</sup>U half-life values and U-Th isotopic measurements by multi-collector inductively  
 54 coupled plasma mass spectrometry, *Earth Planet. Sci. Lett.*, 371-372, 82-91,  
 55 <https://doi.org/10.1016/j.epsl.2013.04.006>, 2013.

56 Cruz. F.W., Vuille. M., Burns. S.J., Wang. X., Cheng. H., Werner. M., Edwards. R.L., Karman. I.,  
 57 Auler. A.S., Nguyen. H.: Orbitally driven east-west antiphasing of South American  
 58 precipitation, *Nat. Geosci.*, 2, 210-214, <https://doi.org/10.1038/ngeo444>, 2009.

59 Fohlmeister. J.: A statistical approach to construct composite climate records of dated archives,  
60 Quat. Geochronol., 14, 48-56, <https://doi.org/10.1016/j.quageo.2012.06.007>, 2012.

61 Jaffey, A.H., Flynn, K.F., Glendenin, L.E., Bentley, W.C., Essling, A.M.: Precision measurement of  
62 half-lives and specific activities of  $^{235}\text{U}$  and  $^{238}\text{U}$ , Physical Rev. C, 4, 1889-1906,  
63 <https://doi.org/10.1103/PhysRevC.4.1889>, 1971.

64 Utida, G., Cruz, F.W., Santos, R.V., Sawakuchi, A.O., Wang, H., Pessenda, L.C.R., Novello, V.F.,  
65 Vuille, M., Strauss, A.M., Borella, A.C., Stríkis, N.M., Guedes, C.C.F., De Andrade, F.D.,  
66 Zhang, H., Cheng, H., Edwards, R.L.: Climate changes in Northeastern Brazil from deglacial to  
67 Meghalayan periods and related environmental impacts, Quat. Sci. Rev., 250, 106655,  
68 <https://doi.org/10.1016/j.quascirev.2020.106655>, 2020.

69 Zhang, H., Cai, Y., Tan, L., Qin, S., An, Z.: Stable isotope composition alteration produced by the  
70 aragonite-to-calcite transformation in speleothems and implications for paleoclimate  
71 reconstructions, Sediment. Geol., 309, 1-14, <https://doi.org/10.1016/j.sedgeo.2014.05.007>,  
72 2014.
